# Supplementary material for: Ionic liquid-mediated transcutaneous protein delivery with solid-in-oil nanodispersions
Source: Royal Society of Chemistry journal article supplement (doi:10.1039/c5md00378d), 2015-01-01
Supplement: c5md00378d1.pdf [file c5md00378d1.pdf]

## Ionic liquid mediated transcutaneous protein delivery with solid-in-oil nanodispersion

Shota Araki, Rie Wakabayashi, Muhammad. Moniruzzaman, Noriho Kamiya and Masahiro Goto

### Supplementary data and Figure

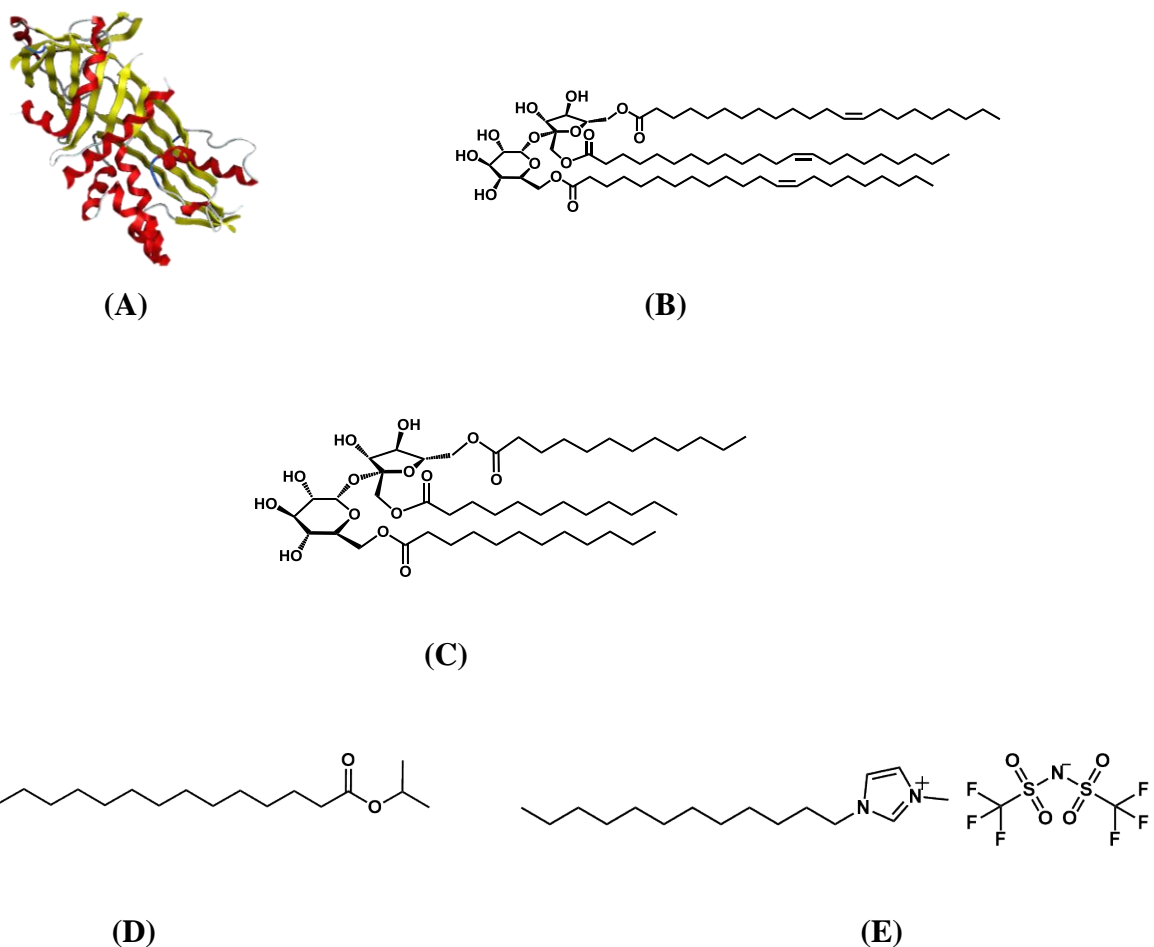

**Fig. S1** (A) ovalbumin (OVA), (B) Surfactant, Sucrose erucate (ER-290); (C) Surfactant Sucrose laurate (L-195) (D) IPM and (E) hydrophobic IL [C<sub>12</sub>mim][Tf<sub>2</sub>N] (1-dodecyl-3-methyl imidazolium bis(trifluoromethyl sulfonyl) amide)

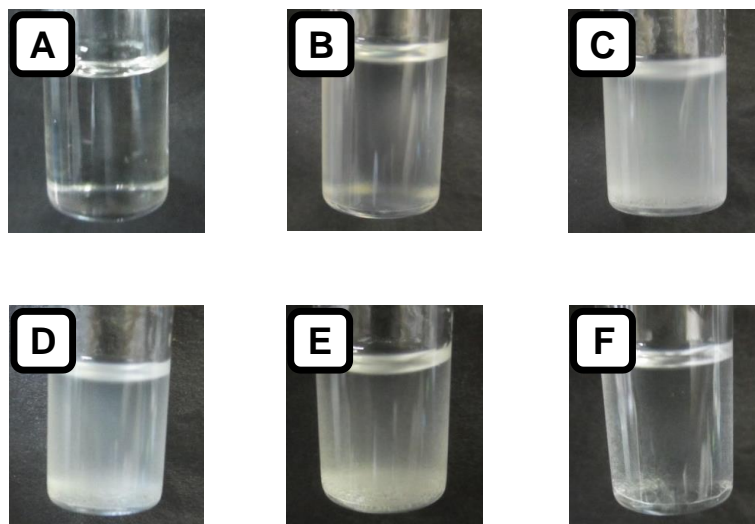

Fig. S2: Photograph showing the solubility of ionic liquids (ILs) of 10vol % and DMSO (10 vol%) in IPM at 25°C: (A)  $[C_{12}mim][Tf_2N]$ , (B)  $[C_8mim][Tf_2N]$ , (C)  $[C_4mim][Tf_2N]$ , (D)  $[C_2mim][DEP]$ , (E)  $[C_2mim][OAc]$  and (F) DMSO

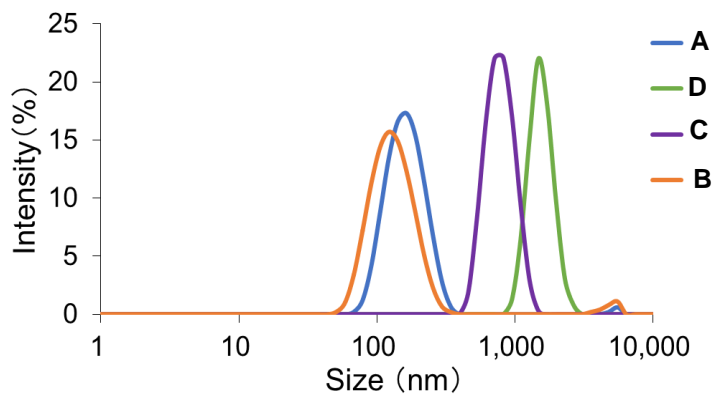

**Fig. S3** Sizes and size distributions of the S/O nanoparticles in IPM with various IL contents. (a) IL = 0, (b) 5 vol% (c) 10vol% and (d) 25 vol% .

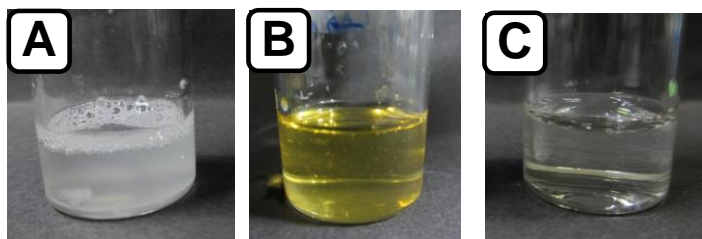

**Fig.S4** Solubility of of phosphatidylcholine (PC) ( $20 \text{ mg mL}^{-1}$ ) in various systems. (A) IPM, (B) IL  $[\text{C}_{12}\text{mim}][\text{Tf}_2\text{N}]$  and (C) IPM + IL system containing 5 vol% IL.

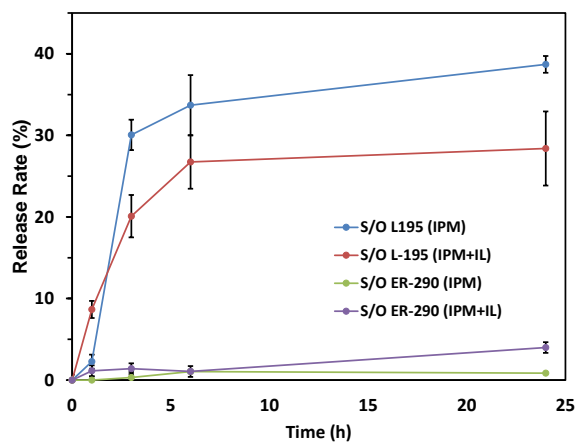

**Fig. S5** Time course of OVA release in PBS from the S/O nanodispersion with and without IL.

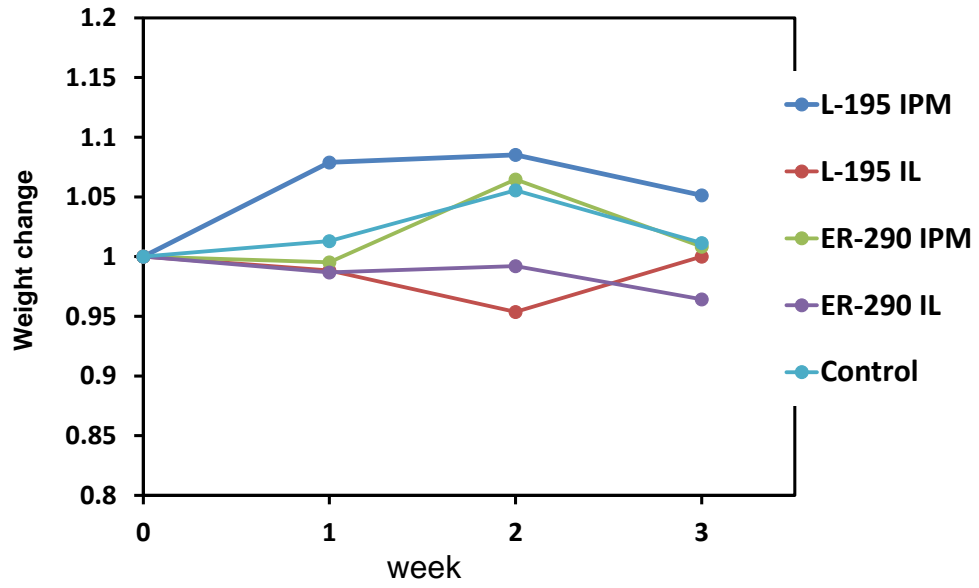

**Fig. S6** Monitoring weigh change of mice with time. Data represents average of 5-6 mice.
